# Supplementary material for: The Antimicrobial Properties of Poplar and Aspen–Poplar Propolises and Their Active Components against Selected Microorganisms, including Helicobacter pylori
Source: MDPI journal article supplement (doi:10.3390/pathogens11020191), 2022-01-31
Supplement: s1 [file s1]

# The Antimicrobial Properties of Poplar and Aspen–Poplar Propolises and their Active Components Against Selected Microorganisms, Including *Helicobacter pylori*

Jarosław Widelski <sup>1,\*†</sup>, Piotr Okińczyc <sup>2,\*†</sup>, Emil Paluch <sup>3</sup>, Tomasz Mroczek <sup>4</sup>, Jakub Szperlik <sup>5</sup>, Magdalena Żuk <sup>6</sup>, Zbigniew Sroka <sup>2</sup>, Zuriyadda Sakipova <sup>7</sup>, Ioanna Chinou <sup>8</sup>, Krystyna Skalicka-Woźniak <sup>4</sup>, Anna Malm <sup>9</sup> and Izabela Korona-Główniak <sup>9</sup>

**Table S1.** Model 1 – components vs. MIC, impact of components on antibacterial activity.

| Microrganism/<br>Component      | <i>S. aureus</i> ATCC<br>25923 | <i>S. aureus</i> ATCC<br>29213 | <i>S. epidermidis</i><br>ATCC 12228 | <i>E. faecalis</i><br>ATCC 29212 | <i>M. luteus</i><br>ATCC 10240 | <i>B. cereus</i><br>ATCC 10876 | <i>H. pylori</i><br>ATCC 43504 | <i>C. albicans</i><br>ATCC 102231 | <i>C. parapsilosis</i><br>ATCC 22019 | <i>C. glabrata</i><br>ATCC 90030 |
|---------------------------------|--------------------------------|--------------------------------|-------------------------------------|----------------------------------|--------------------------------|--------------------------------|--------------------------------|-----------------------------------|--------------------------------------|----------------------------------|
| Caffeic acid                    | R=-0.053                       | R=0.012                        | R=-0.226                            | R=-0.313                         | R=-0.050                       | R=-0.361                       | R=0.061                        | R=-0.095                          | R=-0.125                             | R=-0.576                         |
|                                 | <i>p</i> =0.883                | <i>p</i> =0.973                | <i>p</i> =0.531                     | <i>p</i> =0.378                  | <i>p</i> =0.891                | <i>p</i> =0.305                | <i>p</i> =0.867                | <i>p</i> =0.795                   | <i>p</i> =0.730                      | <i>p</i> =0.081                  |
| <i>p</i> -Coumaric acid         | R=0.871                        | R=0.801                        | R=0.923                             | R=0.610                          | R=0.855                        | R=0.852                        | R=0.728                        | R=0.845                           | R=0.869                              | R=0.949                          |
|                                 | <i>p</i> =0.001                | <i>p</i> =0.005                | <i>p</i> =0.000                     | <i>p</i> =0.061                  | <i>p</i> =0.002                | <i>p</i> =0.002                | <i>p</i> =0.017                | <i>p</i> =0.002                   | <i>p</i> =0.001                      | <i>p</i> =0.000                  |
| Vanillin                        | R=0.965                        | R=0.946                        | R=0.990                             | R=0.680                          | R=0.966                        | R=0.934                        | R=0.832                        | R=0.962                           | R=0.967                              | R=0.882                          |
|                                 | <i>p</i> =0.000                | <i>p</i> =0.000                | <i>p</i> =0.000                     | <i>p</i> =0.031                  | <i>p</i> =0.000                | <i>p</i> =0.000                | <i>p</i> =0.003                | <i>p</i> =0.000                   | <i>p</i> =0.000                      | <i>p</i> =0.001                  |
| Ferulic acid                    | R=0.842                        | R=0.811                        | R=0.840                             | R=0.545                          | R=0.852                        | R=0.836                        | R=0.669                        | R=0.841                           | R=0.859                              | R=0.777                          |
|                                 | <i>p</i> =0.002                | <i>p</i> =0.004                | <i>p</i> =0.002                     | <i>p</i> =0.103                  | <i>p</i> =0.002                | <i>p</i> =0.003                | <i>p</i> =0.034                | <i>p</i> =0.002                   | <i>p</i> =0.001                      | <i>p</i> =0.008                  |
| Isoferulic acid                 | R=-0.178                       | R=-0.170                       | R=-0.332                            | R=-0.325                         | R=-0.187                       | R=-0.430                       | R=-0.130                       | R=-0.257                          | R=-0.271                             | R=-0.584                         |
|                                 | <i>p</i> =0.623                | <i>p</i> =0.638                | <i>p</i> =0.349                     | <i>p</i> =0.359                  | <i>p</i> =0.605                | <i>p</i> =0.215                | <i>p</i> =0.720                | <i>p</i> =0.474                   | <i>p</i> =0.448                      | <i>p</i> =0.076                  |
| Benzoic acid                    | R=0.667                        | R=0.618                        | R=0.781                             | R=0.467                          | R=0.680                        | R=0.825                        | R=0.465                        | R=0.660                           | R=0.691                              | R=0.866                          |
|                                 | <i>p</i> =0.035                | <i>p</i> =0.057                | <i>p</i> =0.008                     | <i>p</i> =0.174                  | <i>p</i> =0.031                | <i>p</i> =0.003                | <i>p</i> =0.176                | <i>p</i> =0.038                   | <i>p</i> =0.027                      | <i>p</i> =0.001                  |
| 3,4-Dimethylcaffeic acid (DMCA) | R=0.127                        | R=0.139                        | R=-0.026                            | R=0.013                          | R=0.113                        | R=-0.168                       | R=0.279                        | R=0.150                           | R=0.132                              | R=-0.159                         |
|                                 | <i>p</i> =0.726                | <i>p</i> =0.701                | <i>p</i> =0.942                     | <i>p</i> =0.972                  | <i>p</i> =0.755                | <i>p</i> =0.643                | <i>p</i> =0.435                | <i>p</i> =0.679                   | <i>p</i> =0.716                      | <i>p</i> =0.660                  |
| Quercetin                       | R=-0.354                       | R=-0.229                       | R=-0.432                            | R=-0.468                         | R=-0.342                       | R=-0.526                       | R=-0.108                       | R=-0.309                          | R=-0.352                             | R=-0.602                         |
|                                 | <i>p</i> =0.316                | <i>p</i> =0.525                | <i>p</i> =0.213                     | <i>p</i> =0.173                  | <i>p</i> =0.334                | <i>p</i> =0.119                | <i>p</i> =0.766                | <i>p</i> =0.386                   | <i>p</i> =0.319                      | <i>p</i> =0.065                  |

|                                                    |          |          |          |          |          |          |          |          |          |          |
|----------------------------------------------------|----------|----------|----------|----------|----------|----------|----------|----------|----------|----------|
| Pinobanksin-5-methyl ether                         | R=-0.583 | R=-0.447 | R=-0.599 | R=-0.728 | R=-0.550 | R=-0.677 | R=-0.436 | R=-0.537 | R=-0.594 | R=-0.801 |
|                                                    | p=0.077  | p=0.195  | p=0.067  | p=0.017  | p=0.100  | p=0.032  | p=0.208  | p=0.110  | p=0.070  | p=0.005  |
| Cinnamic acid                                      | R=0.929  | R=0.944  | R=0.838  | R=0.571  | R=0.937  | R=0.755  | R=0.877  | R=0.931  | R=0.920  | R=0.590  |
|                                                    | p=0.000  | p=0.000  | p=0.002  | p=0.085  | p=0.000  | p=0.012  | p=0.001  | p=0.000  | p=0.000  | p=0.073  |
| Quercetin-3-methyl ether                           | R=-0.481 | R=-0.337 | R=-0.548 | R=-0.624 | R=-0.452 | R=-0.660 | R=-0.244 | R=-0.407 | R=-0.464 | R=-0.758 |
|                                                    | p=0.159  | p=0.342  | p=0.101  | p=0.054  | p=0.189  | p=0.038  | p=0.497  | p=0.243  | p=0.177  | p=0.011  |
| Pinobanksin                                        | R=-0.554 | R=-0.454 | R=-0.614 | R=-0.574 | R=-0.534 | R=-0.621 | R=-0.430 | R=-0.557 | R=-0.591 | R=-0.798 |
|                                                    | p=0.097  | p=0.187  | p=0.059  | p=0.083  | p=0.112  | p=0.055  | p=0.215  | p=0.095  | p=0.072  | p=0.006  |
| Apigenin                                           | R=0.006  | R=-0.063 | R=0.047  | R=0.092  | R=0.005  | R=0.122  | R=-0.219 | R=-0.071 | R=-0.062 | R=0.024  |
|                                                    | p=0.987  | p=0.862  | p=0.898  | p=0.801  | p=0.989  | p=0.738  | p=0.542  | p=0.845  | p=0.866  | p=0.947  |
| Kempferol                                          | R=-0.025 | R=-0.078 | R=-0.015 | R=0.367  | R=-0.052 | R=0.127  | R=-0.058 | R=-0.071 | R=-0.048 | R=0.101  |
|                                                    | p=0.946  | p=0.831  | p=0.968  | p=0.297  | p=0.887  | p=0.727  | p=0.874  | p=0.845  | p=0.895  | p=0.781  |
| Isorhamnetin                                       | R=-0.271 | R=0.324  | R=-0.246 | R=0.346  | R=-0.289 | R=-0.022 | R=-0.265 | R=-0.261 | R=-0.234 | R=0.003  |
|                                                    | p=0.448  | p=0.361  | p=0.493  | p=0.328  | p=0.418  | p=0.953  | p=0.459  | p=0.467  | p=0.516  | p=0.993  |
| Luteolin-5-methyl ether                            | R=-0.505 | R=-0.460 | R=-0.529 | R=-0.006 | R=-0.487 | R=-0.344 | R=-0.430 | R=-0.469 | R=-0.483 | R=-0.535 |
|                                                    | p=0.136  | p=0.181  | p=0.116  | p=0.987  | p=0.153  | p=0.330  | p=0.215  | p=0.172  | p=0.157  | p=0.111  |
| Quercetine-5,7-dimethyl ether                      | R=-0.156 | R=-0.163 | R=-0.173 | R=0.331  | R=-0.164 | R=-0.049 | R=-0.076 | R=-0.111 | R=-0.111 | R=-0.076 |
|                                                    | p=0.668  | p=0.653  | p=0.632  | p=0.350  | p=0.651  | p=0.894  | p=0.834  | p=0.761  | p=0.760  | p=0.834  |
| Rhamnetin                                          | R=-0.318 | R=-0.239 | R=-0.392 | R=-0.279 | R=-0.308 | R=-0.364 | R=-0.203 | R=-0.326 | R=-0.346 | R=-0.543 |
|                                                    | p=0.371  | p=0.505  | p=0.262  | p=0.436  | p=0.387  | p=0.301  | p=0.574  | p=0.359  | p=0.328  | p=0.105  |
| Quercetin-dimethyl ether                           | R=-0.243 | R=-0.197 | R=-0.303 | R=0.004  | R=-0.242 | R=-0.296 | R=-0.071 | R=-0.167 | R=-0.192 | R=-0.303 |
|                                                    | p=0.499  | p=0.585  | p=0.394  | p=0.991  | p=0.500  | p=0.407  | p=0.845  | p=0.645  | p=0.595  | p=0.395  |
| 2-Acetyl-1-caffeoyl-3- <i>p</i> -coumaroylglycerol | R=0.485  | R=0.442  | R=0.453  | R=0.115  | R=0.483  | R=0.384  | R=0.365  | R=0.483  | R=0.504  | R=0.466  |
|                                                    | p=0.156  | p=0.201  | p=0.188  | p=0.752  | p=0.157  | p=0.274  | p=0.300  | p=0.157  | p=0.138  | p=0.175  |
| Quercetin-dimethyl ether                           | R=-0.465 | R=-0.364 | R=-0.504 | R=-0.499 | R=-0.450 | R=-0.609 | R=-0.266 | R=-0.397 | R=-0.443 | R=-0.625 |
|                                                    | p=0.175  | p=0.301  | p=0.137  | p=0.142  | p=0.191  | p=0.062  | p=0.458  | p=0.256  | p=0.199  | p=0.053  |
| 2-Acetyl-3-caffeoyl-1-feruloylglycerol             | R=0.536  | R=0.485  | R=0.574  | R=0.217  | R=0.545  | R=0.560  | R=0.362  | R=0.537  | R=0.573  | R=0.641  |
|                                                    | p=0.110  | p=0.155  | p=0.083  | p=0.547  | p=0.103  | p=0.092  | p=0.305  | p=0.109  | p=0.083  | p=0.046  |
| Caffeic acid prenyl ester 1                        | R=-0.287 | R=-0.297 | R=-0.339 | R=-0.405 | R=-0.317 | R=-0.438 | R=-0.426 | R=-0.375 | R=-0.382 | R=-0.520 |
|                                                    | p=0.422  | p=0.404  | p=0.338  | p=0.246  | p=0.372  | p=0.206  | p=0.219  | p=0.286  | p=0.276  | p=0.123  |
| Chrysin                                            | R=-0.585 | R=-0.444 | R=-0.663 | R=-0.652 | R=-0.555 | R=-0.741 | R=-0.315 | R=-0.524 | R=-0.580 | R=-0.858 |
|                                                    | p=0.076  | p=0.199  | p=0.037  | p=0.041  | p=0.096  | p=0.014  | p=0.375  | p=0.120  | p=0.079  | p=0.002  |
| Pinocembrin                                        | R=-0.477 | R=-0.381 | R=-0.458 | R=-0.508 | R=-0.450 | R=-0.416 | R=-0.444 | R=-0.454 | R=-0.484 | R=-0.545 |
|                                                    | p=0.164  | p=0.278  | p=0.184  | p=0.133  | p=0.192  | p=0.231  | p=0.198  | p=0.187  | p=0.156  | p=0.103  |
|                                                    | R=0.056  | R=-0.063 | R=0.112  | R=0.600  | R=0.027  | R=0.319  | R=-0.067 | R=0.023  | R=0.067  | R=0.387  |

|                                                      |            |            |            |            |            |            |            |            |            |            |
|------------------------------------------------------|------------|------------|------------|------------|------------|------------|------------|------------|------------|------------|
| Acacetin                                             | $p=0.878$  | $p=0.862$  | $p=0.757$  | $p=0.067$  | $p=0.941$  | $p=0.368$  | $p=0.854$  | $p=0.949$  | $p=0.854$  | $p=0.269$  |
| Caffeic acid prenyl ester 2                          | $R=-0.225$ | $R=-0.156$ | $R=-0.255$ | $R=-0.214$ | $R=-0.215$ | $R=-0.336$ | $R=-0.047$ | $R=-0.143$ | $R=-0.178$ | $R=-0.298$ |
| Pinocembrin chalcone                                 | $p=0.532$  | $p=0.668$  | $p=0.478$  | $p=0.553$  | $p=0.550$  | $p=0.343$  | $p=0.897$  | $p=0.694$  | $p=0.622$  | $p=0.403$  |
| *Caffeic acid prenyl ester 3                         | $R=-0.225$ | $R=-0.156$ | $R=-0.255$ | $R=-0.214$ | $R=-0.215$ | $R=-0.336$ | $R=-0.047$ | $R=-0.143$ | $R=-0.178$ | $R=-0.298$ |
|                                                      | $p=0.532$  | $p=0.668$  | $p=0.478$  | $p=0.553$  | $p=0.550$  | $p=0.343$  | $p=0.897$  | $p=0.694$  | $p=0.622$  | $p=0.403$  |
|                                                      | $R=-0.288$ | $R=-0.269$ | $R=-0.399$ | $R=-0.393$ | $R=-0.306$ | $R=-0.579$ | $R=-0.069$ | $R=-0.285$ | $R=-0.305$ | $R=-0.476$ |
| *Caffeic acid benzyl ester                           | $p=0.420$  | $p=0.452$  | $p=0.254$  | $p=0.261$  | $p=0.390$  | $p=0.080$  | $p=0.851$  | $p=0.425$  | $p=0.392$  | $p=0.165$  |
|                                                      | $R=0.153$  | $R=0.184$  | $R=0.021$  | $R=-0.179$ | $R=0.155$  | $R=-0.071$ | $R=0.161$  | $R=0.114$  | $R=0.106$  | $R=-0.214$ |
|                                                      | $p=0.673$  | $p=0.610$  | $p=0.955$  | $p=0.620$  | $p=0.668$  | $p=0.846$  | $p=0.657$  | $p=0.755$  | $p=0.771$  | $p=0.553$  |
| Sakuranetin                                          | $R=-0.011$ | $R=-0.110$ | $R=0.091$  | $R=0.501$  | $R=-0.034$ | $R=0.281$  | $R=-0.111$ | $R=-0.018$ | $R=0.018$  | $R=0.401$  |
|                                                      | $p=0.976$  | $p=0.763$  | $p=0.803$  | $p=0.141$  | $p=0.927$  | $p=0.431$  | $p=0.761$  | $p=0.961$  | $p=0.962$  | $p=0.250$  |
| Genkwanin                                            | $R=0.054$  | $R=-0.061$ | $R=0.090$  | $R=0.622$  | $R=0.026$  | $R=0.309$  | $R=-0.065$ | $R=0.022$  | $R=0.065$  | $R=0.342$  |
|                                                      | $p=0.882$  | $p=0.867$  | $p=0.806$  | $p=0.055$  | $p=0.943$  | $p=0.385$  | $p=0.859$  | $p=0.951$  | $p=0.859$  | $p=0.334$  |
| Galangin                                             | $R=-0.550$ | $R=-0.461$ | $R=-0.581$ | $R=-0.712$ | $R=-0.529$ | $R=-0.638$ | $R=-0.458$ | $R=-0.564$ | $R=-0.594$ | $R=-0.751$ |
|                                                      | $p=0.100$  | $p=0.180$  | $p=0.078$  | $p=0.021$  | $p=0.116$  | $p=0.047$  | $p=0.183$  | $p=0.090$  | $p=0.070$  | $p=0.012$  |
| Kaempferide                                          | $R=0.155$  | $R=0.019$  | $R=0.274$  | $R=0.540$  | $R=0.123$  | $R=0.426$  | $R=-0.007$ | $R=0.116$  | $R=0.169$  | $R=0.611$  |
|                                                      | $p=0.670$  | $p=0.959$  | $p=0.444$  | $p=0.108$  | $p=0.736$  | $p=0.220$  | $p=0.984$  | $p=0.749$  | $p=0.640$  | $p=0.061$  |
| 2-Acetyl-1,3-di- <i>p</i> -Coumaroyl glycerol        | $R=0.808$  | $R=0.713$  | $R=0.782$  | $R=0.900$  | $R=0.789$  | $R=0.868$  | $R=0.640$  | $R=0.783$  | $R=0.819$  | $R=0.829$  |
|                                                      | $p=0.005$  | $p=0.021$  | $p=0.008$  | $p=0.000$  | $p=0.007$  | $p=0.001$  | $p=0.046$  | $p=0.007$  | $p=0.004$  | $p=0.003$  |
| Pinobanksin-3O-acetate                               | $R=-0.627$ | $R=-0.516$ | $R=-0.631$ | $R=-0.687$ | $R=-0.589$ | $R=-0.617$ | $R=-0.546$ | $R=-0.603$ | $R=-0.637$ | $R=-0.775$ |
|                                                      | $p=0.053$  | $p=0.127$  | $p=0.050$  | $p=0.028$  | $p=0.073$  | $p=0.057$  | $p=0.102$  | $p=0.065$  | $p=0.048$  | $p=0.008$  |
| Quercetin-dimethyl                                   | $R=0.057$  | $R=-0.065$ | $R=0.127$  | $R=0.582$  | $R=0.028$  | $R=0.325$  | $R=-0.068$ | $R=0.024$  | $R=0.069$  | $R=0.416$  |
|                                                      | $p=0.875$  | $p=0.859$  | $p=0.726$  | $p=0.077$  | $p=0.939$  | $p=0.359$  | $p=0.851$  | $p=0.948$  | $p=0.851$  | $p=0.232$  |
| **2-Acetyl-3- <i>p</i> -coumaroyl-1-feruloylglycerol | $R=0.833$  | $R=0.765$  | $R=0.811$  | $R=0.645$  | $R=0.827$  | $R=0.819$  | $R=0.658$  | $R=0.824$  | $R=0.853$  | $R=0.812$  |
|                                                      | $p=0.003$  | $p=0.010$  | $p=0.004$  | $p=0.044$  | $p=0.003$  | $p=0.004$  | $p=0.039$  | $p=0.003$  | $p=0.002$  | $p=0.004$  |

**Table legend:** R—square R parameter;  $p$ —Pearson's correlation parameter; *S. aureus*—*Staphylococcus aureus*; *S. epidermidis*—*Staphylococcus epidermidis*; *E. faecalis*—*Enterococcus faecalis*; *M. luteus*—*Micrococcus luteus*; *B. cereus*—*Bacillus cereus*; *H. pylori*—*Helicobacter pylori*; *C. albicans*—*Candida albicans*; *C. parapsilosis*—*Candida parapsilosis*; *C. glabrata*—*Candida glabrata*.

**Table S2.** Model 2—significant components vs. significant components, an analysis of connections between presence of significant components in Model 1.

| Significant Component                        | <i>p</i> -Coumaric Acid     | Vanillin e                  | Ferulic Acid                | Benzoic Acid                | Pinobanksin-5-Methyl Ether  | Cinnamic Acid               | Pinobanksin                 | 2-Acetyl-3-Caffeoyl-1-Feruloylglycerol | Chrysin                     | Galangin                    | 2-Acetyl-1,3-di- <i>p</i> -Coumaroylglycerol | Pinobanksin-3O-Acetate      | **2-Acetyl-3- <i>p</i> -Coumaroyl-1-Feruloylglycerol |
|----------------------------------------------|-----------------------------|-----------------------------|-----------------------------|-----------------------------|-----------------------------|-----------------------------|-----------------------------|----------------------------------------|-----------------------------|-----------------------------|----------------------------------------------|-----------------------------|------------------------------------------------------|
| <i>p</i> -Coumaric acid                      | R=1.000<br><i>p</i> = ---   | R=0.938<br><i>p</i> =0.000  | R=0.839<br><i>p</i> =0.002  | R=0.803<br><i>p</i> =0.005  | R=-0.768<br><i>p</i> =0.009 | R=0.761<br><i>p</i> =0.011  | R=-0.732<br><i>p</i> =0.016 | R=0.679<br><i>p</i> =0.031             | R=-0.784<br><i>p</i> =0.007 | R=-0.667<br><i>p</i> =0.035 | R=0.819<br><i>p</i> =0.004                   | R=-0.783<br><i>p</i> =0.007 | R=0.871<br><i>p</i> =0.001                           |
| Vanillin                                     | R=0.938<br><i>p</i> =0.000  | R=1.000<br><i>p</i> = ---   | R=0.870<br><i>p</i> =0.001  | R=0.790<br><i>p</i> =0.007  | R=-0.599<br><i>p</i> =0.067 | R=0.874<br><i>p</i> =0.001  | R=-0.610<br><i>p</i> =0.061 | R=0.616<br><i>p</i> =0.058             | R=-0.639<br><i>p</i> =0.047 | R=-0.572<br><i>p</i> =0.084 | R=0.776<br><i>p</i> =0.008                   | R=-0.633<br><i>p</i> =0.049 | R=0.837<br><i>p</i> =0.002                           |
| Ferulic acid                                 | R=0.839<br><i>p</i> =0.002  | R=0.870<br><i>p</i> =0.001  | R=1.000<br><i>p</i> = ---   | R=0.873<br><i>p</i> =0.001  | R=-0.592<br><i>p</i> =0.071 | R=0.845<br><i>p</i> =0.002  | R=-0.531<br><i>p</i> =0.114 | R=0.886<br><i>p</i> =0.001             | R=-0.685<br><i>p</i> =0.029 | R=-0.440<br><i>p</i> =0.203 | R=0.751<br><i>p</i> =0.012                   | R=-0.480<br><i>p</i> =0.160 | R=0.952<br><i>p</i> =0.000                           |
| Benzoic acid                                 | R=0.803<br><i>p</i> =0.005  | R=0.790<br><i>p</i> =0.007  | R=0.873<br><i>p</i> =0.001  | R=1.000<br><i>p</i> = ---   | R=-0.613<br><i>p</i> =0.060 | R=0.555<br><i>p</i> =0.096  | R=-0.529<br><i>p</i> =0.116 | R=0.814<br><i>p</i> =0.004             | R=-0.797<br><i>p</i> =0.006 | R=-0.431<br><i>p</i> =0.214 | R=0.672<br><i>p</i> =0.033                   | R=-0.413<br><i>p</i> =0.236 | R=0.791<br><i>p</i> =0.006                           |
| Pinobanksin-5-methyl ether                   | R=-0.768<br><i>p</i> =0.009 | R=-0.599<br><i>p</i> =0.067 | R=-0.592<br><i>p</i> =0.071 | R=-0.613<br><i>p</i> =0.060 | R=1.000<br><i>p</i> = ---   | R=-0.389<br><i>p</i> =0.266 | R=0.771<br><i>p</i> =0.009  | R=-0.517<br><i>p</i> =0.126            | R=0.928<br><i>p</i> =0.000  | R=0.804<br><i>p</i> =0.005  | R=-0.917<br><i>p</i> =0.000                  | R=0.883<br><i>p</i> =0.001  | R=-0.764<br><i>p</i> =0.010                          |
| Cinnamic acid                                | R=0.761<br><i>p</i> =0.011  | R=0.874<br><i>p</i> =0.001  | R=0.845<br><i>p</i> =0.002  | R=0.555<br><i>p</i> =0.096  | R=-0.389<br><i>p</i> =0.266 | R=1.000<br><i>p</i> = ---   | R=-0.383<br><i>p</i> =0.275 | R=0.577<br><i>p</i> =0.081             | R=-0.370<br><i>p</i> =0.293 | R=-0.343<br><i>p</i> =0.332 | R=0.642<br><i>p</i> =0.046                   | R=-0.457<br><i>p</i> =0.184 | R=0.801<br><i>p</i> =0.005                           |
| Pinobanksin                                  | R=-0.732<br><i>p</i> =0.016 | R=-0.610<br><i>p</i> =0.061 | R=-0.531<br><i>p</i> =0.114 | R=-0.529<br><i>p</i> =0.116 | R=0.771<br><i>p</i> =0.009  | R=-0.383<br><i>p</i> =0.275 | R=1.000<br><i>p</i> = ---   | R=-0.514<br><i>p</i> =0.128            | R=0.701<br><i>p</i> =0.024  | R=0.954<br><i>p</i> =0.000  | R=-0.767<br><i>p</i> =0.010                  | R=0.893<br><i>p</i> =0.000  | R=-0.705<br><i>p</i> =0.023                          |
| 2-Acetyl-3-caffeoyl-1-feruloylglycerol       | R=0.679<br><i>p</i> =0.031  | R=0.616<br><i>p</i> =0.058  | R=0.886<br><i>p</i> =0.001  | R=0.814<br><i>p</i> =0.004  | R=-0.517<br><i>p</i> =0.126 | R=0.577<br><i>p</i> =0.081  | R=-0.514<br><i>p</i> =0.128 | R=1.000<br><i>p</i> = ---              | R=-0.640<br><i>p</i> =0.046 | R=-0.347<br><i>p</i> =0.326 | R=0.552<br><i>p</i> =0.098                   | R=-0.360<br><i>p</i> =0.307 | R=0.855<br><i>p</i> =0.002                           |
| Chrysin                                      | R=-0.784<br><i>p</i> =0.007 | R=-0.639<br><i>p</i> =0.047 | R=-0.685<br><i>p</i> =0.029 | R=-0.797<br><i>p</i> =0.006 | R=0.928<br><i>p</i> =0.000  | R=-0.370<br><i>p</i> =0.293 | R=0.701<br><i>p</i> =0.024  | R=-0.640<br><i>p</i> =0.046            | R=1.000<br><i>p</i> = ---   | R=0.673<br><i>p</i> =0.033  | R=-0.862<br><i>p</i> =0.001                  | R=0.722<br><i>p</i> =0.018  | R=-0.775<br><i>p</i> =0.008                          |
| Galangin                                     | R=-0.667<br><i>p</i> =0.035 | R=-0.572<br><i>p</i> =0.084 | R=-0.440<br><i>p</i> =0.203 | R=-0.431<br><i>p</i> =0.214 | R=0.804<br><i>p</i> =0.005  | R=-0.343<br><i>p</i> =0.332 | R=0.954<br><i>p</i> =0.000  | R=-0.347<br><i>p</i> =0.326            | R=0.673<br><i>p</i> =0.033  | R=1.000<br><i>p</i> = ---   | R=-0.815<br><i>p</i> =0.004                  | R=0.925<br><i>p</i> =0.000  | R=-0.642<br><i>p</i> =0.045                          |
| 2-Acetyl-1,3-di- <i>p</i> -coumaroylglycerol | R=0.819<br><i>p</i> =0.004  | R=0.776<br><i>p</i> =0.008  | R=0.751<br><i>p</i> =0.012  | R=0.672<br><i>p</i> =0.033  | R=-0.917<br><i>p</i> =0.000 | R=0.642<br><i>p</i> =0.046  | R=-0.767<br><i>p</i> =0.010 | R=0.552<br><i>p</i> =0.098             | R=-0.862<br><i>p</i> =0.001 | R=-0.815<br><i>p</i> =0.004 | R=1.000<br><i>p</i> = ---                    | R=-0.844<br><i>p</i> =0.002 | R=0.874<br><i>p</i> =0.001                           |
| Pinobanksin-3O-acetate                       | R=-0.783<br><i>p</i> =0.007 | R=-0.633<br><i>p</i> =0.049 | R=-0.480<br><i>p</i> =0.160 | R=-0.413<br><i>p</i> =0.236 | R=0.883<br><i>p</i> =0.001  | R=-0.457<br><i>p</i> =0.184 | R=0.893<br><i>p</i> =0.000  | R=-0.360<br><i>p</i> =0.307            | R=0.722<br><i>p</i> =0.018  | R=0.925<br><i>p</i> =0.000  | R=-0.844<br><i>p</i> =0.002                  | R=1.000<br><i>p</i> = ---   | R=-0.692<br><i>p</i> =0.027                          |
|                                              | R=0.871                     | R=0.837                     | R=0.952                     | R=0.791                     | R=-0.764                    | R=0.801                     | R=-0.705                    | R=0.855                                | R=-0.775                    | R=-0.642                    | R=0.874                                      | R=-0.692                    | R=1.000                                              |

|                                                      |                 |                 |                 |                 |                 |                 |                 |                 |                 |                 |                 |                 |               |
|------------------------------------------------------|-----------------|-----------------|-----------------|-----------------|-----------------|-----------------|-----------------|-----------------|-----------------|-----------------|-----------------|-----------------|---------------|
| **2-Acetyl-3- <i>p</i> -coumaroyl-1-feruloylglycerol | <i>p</i> =0.001 | <i>p</i> =0.002 | <i>p</i> =0.000 | <i>p</i> =0.006 | <i>p</i> =0.010 | <i>p</i> =0.005 | <i>p</i> =0.023 | <i>p</i> =0.002 | <i>p</i> =0.008 | <i>p</i> =0.045 | <i>p</i> =0.001 | <i>p</i> =0.027 | <i>p</i> =--- |
|------------------------------------------------------|-----------------|-----------------|-----------------|-----------------|-----------------|-----------------|-----------------|-----------------|-----------------|-----------------|-----------------|-----------------|---------------|

**Table legend:** R—square R parameter; *p*—Pearson’s correlation parameter.

**Table S3.** The antimicrobial activity (mg/L) of reference drugs: vancomycin, clarithromycin, ciprofloxacin, and nystatin against reference strains.

| Microorganism                                 | MIC [mg/L]            |
|-----------------------------------------------|-----------------------|
| <b>Gram-Positive Bacteria</b>                 | <b>Vancomycin</b>     |
| <i>S. aureus</i> ATCC 25923                   | 0.49                  |
| <i>S. aureus</i> ATCC 29213                   | 0.98                  |
| <i>S. epidermidis</i> ATCC 12228              | 0.98                  |
| <i>E. faecalis</i> ATCC 29212                 | 1.95                  |
| <i>M. luteus</i> ATCC 10240                   | 0.12                  |
| <i>B. cereus</i> ATCC 10876                   | 0.98                  |
| <b>Gram-Negative Microaerophilic Bacteria</b> | <b>Clarithromycin</b> |
| <i>H. pylori</i> ATCC 43504                   | 0.125                 |
| <b>Gram-Negative Bacteria</b>                 | <b>Ciprofloxacin</b>  |
| <i>S. typhimurium</i> ATCC 14028              | 0.061                 |
| <i>E. coli</i> ATCC 25922                     | 0.015                 |
| <i>P. mirabilis</i> ATCC 12453                | 0.03                  |
| <i>K. pneumoniae</i> ATCC 13883               | 0.12                  |
| <i>P. aeruginosa</i> ATCC 9027                | 0.48                  |
| <b>Yeasts</b>                                 | <b>Nystatin</b>       |
| <i>C. albicans</i> ATCC 102231                | 0.48                  |
| <i>C. parapsilosis</i> ATCC 22019             | 0.24                  |
| <i>C. glabrata</i> ATCC 90030                 | 0.24                  |

Table S4. Input data of statistical analyses.

| Microorganism—Mic (mg/ML)                          | PLS1 | PLS2  | PLS3  | PLU  | UK1   | UK2   | UK3   | UKT   | KZ.AO | G.PA  |
|----------------------------------------------------|------|-------|-------|------|-------|-------|-------|-------|-------|-------|
| <i>S. aureus</i> ATCC 25923                        | 0.16 | 0.63  | 0.08  | 0.16 | 0.04  | 0.04  | 0.08  | 0.01  | 0.16  | 0.02  |
| <i>S. aureus</i> ATCC 29213                        | 0.31 | 2.50  | 0.08  | 0.31 | 0.16  | 0.16  | 0.16  | 0.01  | 0.31  | 0.08  |
| <i>S. epidermidis</i> ATCC                         | 0.08 | 0.31  | 0.04  | 0.16 | 0.04  | 0.04  | 0.08  | 0.01  | 0.08  | 0.02  |
| <i>E. faecalis</i> ATCC 29212                      | 0.31 | 2.50  | 0.16  | 0.63 | 0.16  | 0.16  | 0.16  | 0.08  | 2.50  | 0.08  |
| <i>M. luteus</i> ATCC 10240                        | 0.08 | 0.31  | 0.04  | 0.08 | 0.04  | 0.04  | 0.04  | 0.01  | 0.08  | 0.02  |
| <i>B. cereus</i> ATCC 10876                        | 0.16 | 0.63  | 0.04  | 0.31 | 0.16  | 0.16  | 0.16  | 0.02  | 0.31  | 0.02  |
| <i>C. albicans</i> ATCC 102231                     | 0.31 | 1.25  | 0.08  | 0.31 | 0.16  | 0.16  | 0.16  | 0.08  | 0.31  | 0.16  |
| <i>C. parapsilosis</i> ATCC 22019                  | 0.31 | 1.25  | 0.04  | 0.31 | 0.08  | 0.16  | 0.08  | 0.02  | 0.31  | 0.08  |
| <i>C. glabrata</i> ATCC 90030                      | 0.31 | 0.63  | 0.08  | 0.63 | 0.16  | 0.16  | 0.16  | 0.08  | 0.31  | 0.08  |
| Components (%PA)                                   | PLS1 | PLS2  | PLS3  | PLU  | UK1   | UK2   | UK3   | UKT   | KZ.AO | G.PA  |
| Caffeic acid                                       | 1.87 | 2.01  | 3.08  | 0.40 | 1.85  | 1.83  | 1.95  | 2.17  | 1.01  | 1.66  |
| <i>p</i> -Coumaric acid                            | 6.20 | 12.10 | 2.08  | 9.01 | 1.16  | 1.37  | 1.20  | 1.47  | 3.23  | 0.41  |
| Vanilline                                          | 0.68 | 2.92  | 0.12  | 1.28 | 0.26  | 0.28  | 0.29  | 0.00  | 0.43  | 0.00  |
| Ferulic acid                                       | 4.54 | 6.29  | 0.98  | 3.03 | 2.57  | 2.66  | 2.18  | 0.95  | 2.12  | 0.48  |
| Isoferulic acid                                    | 1.15 | 0.76  | 2.14  | 0.00 | 1.03  | 0.86  | 1.07  | 0.94  | 0.58  | 0.67  |
| Benzoic acid                                       | 1.68 | 2.50  | 0.53  | 2.35 | 1.50  | 1.64  | 1.27  | 0.53  | 1.23  | 0.13  |
| 3,4-Dimethylcaffeic acid (DMCA)                    | 1.37 | 1.03  | 1.05  | 0.00 | 0.08  | 0.09  | 0.08  | 0.55  | 0.52  | 2.13  |
| Quercetin                                          | 0.19 | 0.32  | 0.46  | 0.00 | 0.51  | 0.44  | 0.49  | 1.41  | 0.00  | 0.57  |
| Pinobanksin-5-methyl ether                         | 0.47 | 0.44  | 1.87  | 0.24 | 2.32  | 1.89  | 2.29  | 1.73  | 0.00  | 2.41  |
| Cinnamic acid                                      | 0.44 | 1.27  | 0.13  | 0.00 | 0.16  | 0.00  | 0.00  | 0.00  | 0.00  | 0.00  |
| Quercetin-3-methyl ether                           | 0.28 | 0.29  | 0.66  | 0.00 | 0.69  | 0.70  | 0.70  | 0.82  | 0.00  | 1.37  |
| Pinobanksin                                        | 1.15 | 0.91  | 3.49  | 0.31 | 3.53  | 3.19  | 3.52  | 4.23  | 1.21  | 1.60  |
| Apigenin                                           | 1.02 | 0.99  | 1.79  | 1.17 | 1.51  | 1.24  | 1.56  | 0.00  | 1.45  | 0.82  |
| Kempferol                                          | 0.77 | 1.07  | 1.16  | 1.36 | 1.07  | 1.01  | 1.13  | 1.86  | 1.87  | 0.48  |
| Isorhamnetin                                       | 0.24 | 0.14  | 0.20  | 0.77 | 0.44  | 0.49  | 0.43  | 0.88  | 1.49  | 0.52  |
| Luteolin-5-methyl ether                            | 0.39 | 0.53  | 1.00  | 0.70 | 1.14  | 1.21  | 1.13  | 0.86  | 1.56  | 1.41  |
| Quercetine-5,7-dimethyl ether                      | 0.15 | 0.35  | 0.35  | 0.57 | 0.31  | 0.41  | 0.35  | 0.44  | 1.20  | 1.19  |
| Rhamnetin                                          | 0.19 | 0.31  | 0.63  | 0.00 | 0.69  | 0.63  | 0.67  | 1.29  | 0.36  | 0.00  |
| Quercetin-dimethyl ether                           | 0.00 | 0.00  | 0.00  | 0.00 | 0.00  | 0.00  | 0.00  | 0.15  | 0.39  | 1.01  |
| 2-Acetyl-1-caffeoyl-3- <i>p</i> -coumaroylglycerol | 1.65 | 1.00  | 0.00  | 0.42 | 0.38  | 0.38  | 0.30  | 0.25  | 0.00  | 0.00  |
| Quercetin-dimethyl ether                           | 0.11 | 0.00  | 0.75  | 0.00 | 0.50  | 0.60  | 0.70  | 0.61  | 0.00  | 2.40  |
| 2-Acetyl-3-caffeoyl-1-feruloylglycerol             | 1.02 | 0.77  | 0.00  | 0.56 | 0.31  | 0.57  | 0.32  | 0.00  | 0.15  | 0.00  |
| Caffeic acid prenyl ester 1                        | 1.52 | 0.56  | 3.10  | 0.11 | 0.60  | 1.56  | 3.08  | 2.41  | 0.59  | 0.00  |
| Chrysin                                            | 4.46 | 3.87  | 11.81 | 1.11 | 12.68 | 10.39 | 10.23 | 13.38 | 2.86  | 17.47 |
| Pinocembrin                                        | 5.41 | 4.88  | 6.52  | 5.10 | 10.61 | 9.48  | 10.68 | 11.40 | 5.13  | 4.52  |

|                                                      |      |      |       |      |       |       |       |       |      |      |
|------------------------------------------------------|------|------|-------|------|-------|-------|-------|-------|------|------|
| Acacetin                                             | 0.00 | 0.00 | 0.00  | 4.44 | 0.00  | 0.00  | 0.00  | 0.00  | 8.28 | 0.00 |
| Caffeic acid prenyl ester 2                          | 0.00 | 0.00 | 0.00  | 0.00 | 0.00  | 0.00  | 0.00  | 0.00  | 0.00 | 4.04 |
| Pinocembrin chalcone                                 | 0.00 | 0.00 | 0.00  | 0.00 | 0.00  | 0.00  | 0.00  | 0.00  | 0.00 | 1.02 |
| *Caffeic acid prenyl ester 3                         | 2.26 | 0.22 | 3.46  | 0.00 | 0.00  | 0.00  | 0.00  | 1.73  | 0.00 | 4.93 |
| *Caffeic acid benzyl ester                           | 5.44 | 4.52 | 4.62  | 0.00 | 3.54  | 3.45  | 3.66  | 5.25  | 0.75 | 0.00 |
| Sakuranetin                                          | 0.53 | 0.84 | 0.00  | 7.10 | 1.65  | 1.16  | 1.37  | 1.46  | 9.23 | 2.37 |
| Genkwanin                                            | 0.00 | 0.00 | 0.00  | 1.62 | 0.00  | 0.00  | 0.00  | 0.00  | 3.72 | 0.00 |
| Galangin                                             | 5.78 | 3.18 | 12.19 | 2.61 | 11.62 | 10.91 | 11.75 | 11.49 | 1.88 | 5.31 |
| Kaempferide                                          | 1.19 | 0.95 | 0.23  | 4.97 | 0.34  | 0.67  | 0.55  | 0.57  | 5.03 | 0.00 |
| 2-Acetyl-1,3-di- <i>p</i> -coumaroylglycerol         | 4.39 | 7.56 | 0.50  | 4.05 | 0.56  | 0.91  | 0.47  | 0.42  | 6.57 | 0.00 |
| Pinobanksin-3O-acetate                               | 3.83 | 1.62 | 8.89  | 1.77 | 12.32 | 12.18 | 12.18 | 8.87  | 2.47 | 6.68 |
| Quercetin-dimethyl                                   | 0.00 | 0.00 | 0.00  | 1.03 | 0.00  | 0.00  | 0.00  | 0.00  | 1.69 | 0.00 |
| **2-Acetyl-3- <i>p</i> -coumaroyl-1-feruloylglycerol | 2.46 | 2.98 | 0.00  | 1.32 | 0.50  | 0.65  | 0.42  | 0.00  | 1.23 | 0.00 |

**Table legend:** \* - component tentatively identified; \*\* - substitution positioning of glycerol was tentatively identified; **GP**—Greece, Parga; **KZ**—Kazakhstan, Almatka Oblast; **PLS1**—Poland, Lower Silesia Region 1; **PLS2**—Poland, Lower Silesia Region 2; **PLS3**—Poland, Lower Silesia Region3; **PLU**—Poland, Lubelszczyzna Region; **UK1**—Ukraine, Khmeltsky 1; **UK2**—Ukraine, Khmeltsky 2; **UK3**—Ukraine, Khmeltsky 3; **UT**—Ukraine, Tarnopol.
